# Supplementary material for: A ratiometric fluorescence sensor for HOCl based on a FRET platform and application in living cells
Source: Royal Society of Chemistry journal article supplement (doi:10.1039/c5ra26027b), 2016-01-01

**A ratiometric fluorescence sensor for HOCl based on FRET platform and application  
in living cells**

Yan-Ru Zhang,<sup>[a]#</sup> Zhi-Min Zhao,<sup>[b]#</sup> Le Su,<sup>[b]</sup> Jun-Ying Miao,<sup>[b]</sup> and Bao-Xiang Zhao\*<sup>[a]</sup>

*<sup>a</sup>Institute of Organic Chemistry, School of Chemistry and Chemical Engineering, Shandong University, Jinan 250100, P.R. China.*

*E-mail: bxzhao@sdu.edu.cn.*

*<sup>b</sup>Institute of Developmental Biology, School of Life Science, Shandong University, Jinan 250100, P.R. China.*

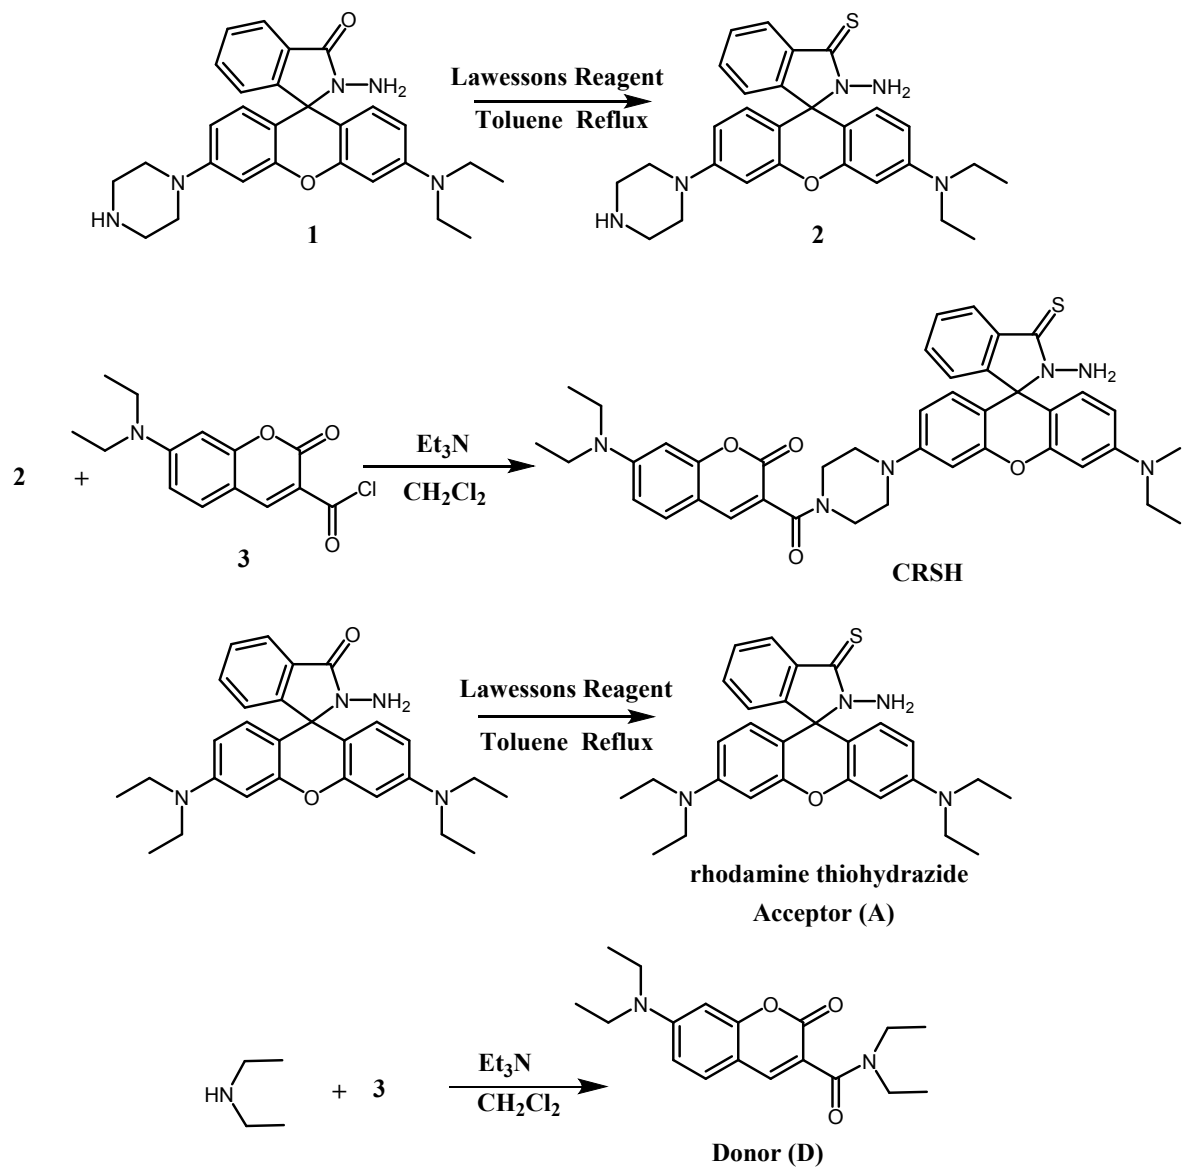

Scheme S1 Synthesis of CRSH

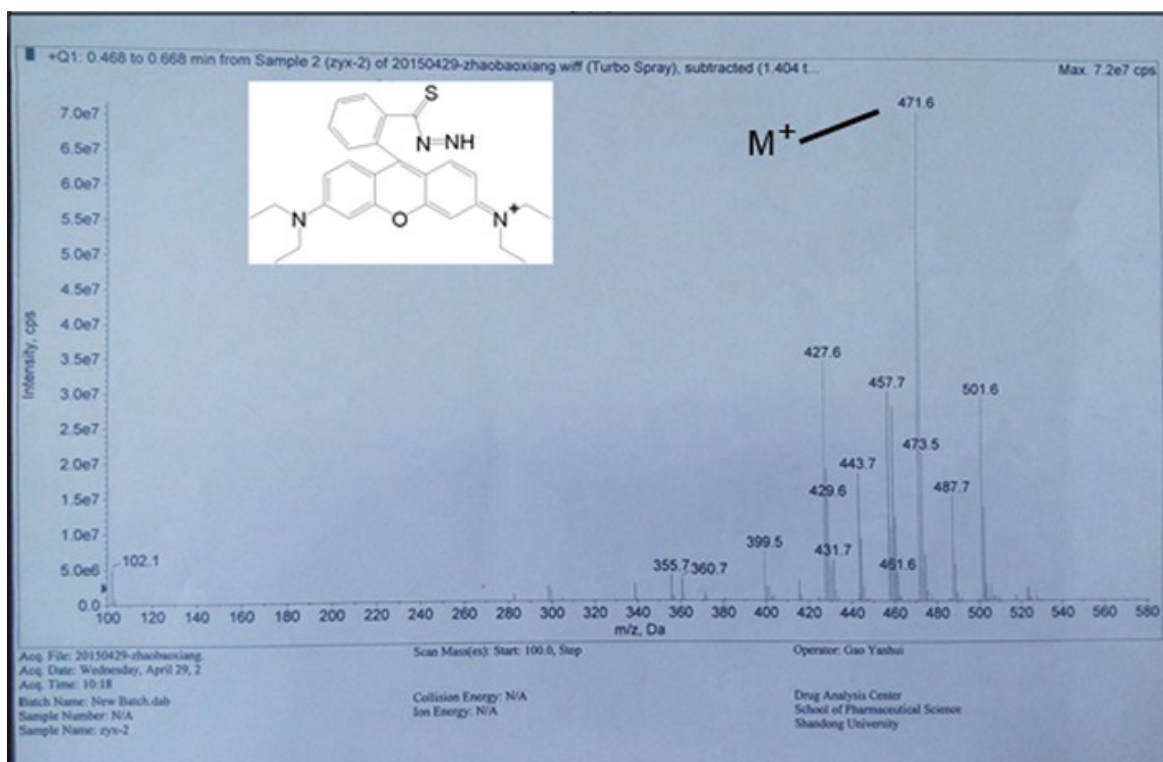

Fig. S1 HRMS spectra of one fluorescent compound separated from the reaction of rhodamine thiohydrazide and HOCl.

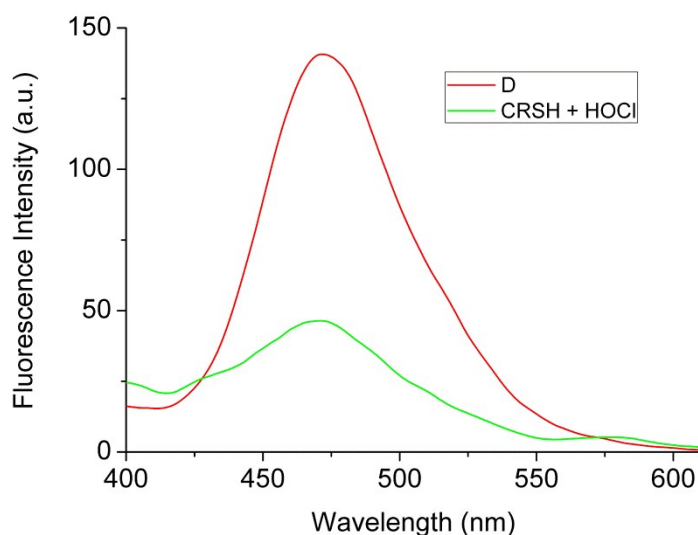

Fig. S2 The red line is the donor (1  $\mu\text{M}$ ) and the green line is **CRSH** (1  $\mu\text{M}$ ) after addition of HOCl (4  $\mu\text{M}$ ) Condition:  $\text{NaH}_2\text{PO}_4$  (0.05 M, pH = 5) : EtOH = 5 : 5 (v/v),  $\lambda_{\text{ex}}$ : 350 nm (slit widths: 10 nm/5 nm).

$$\text{Energy transfer efficiency (CRSH)} = 1 - F_{\text{DA}}/F_{\text{D}} = 1 - 46.3481/140.4140 = 67.0\%$$

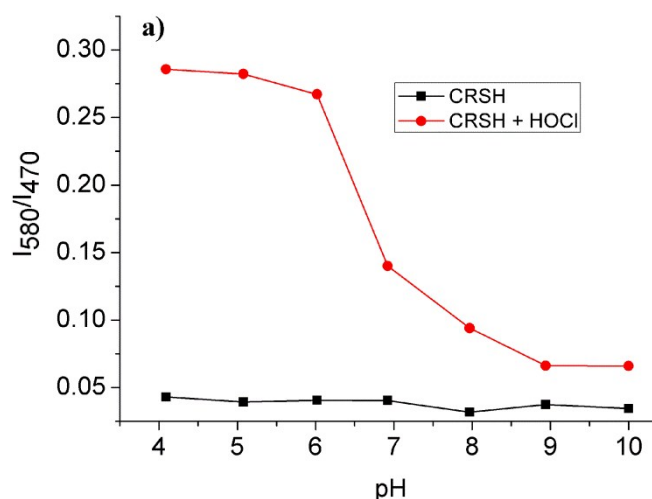

Fig. S3 pH-dependent fluorescence intensity ratio changes of CRSH, Condition: [CRSH] = 1  $\mu$ M, NaH<sub>2</sub>PO<sub>4</sub> (0.05 M, pH = 4-10) : EtOH (5 : 5, v/v),  $\lambda_{\text{ex}}$ : 350 nm (slit widths: 10 nm/10 nm), HOCl (4  $\mu$ M).

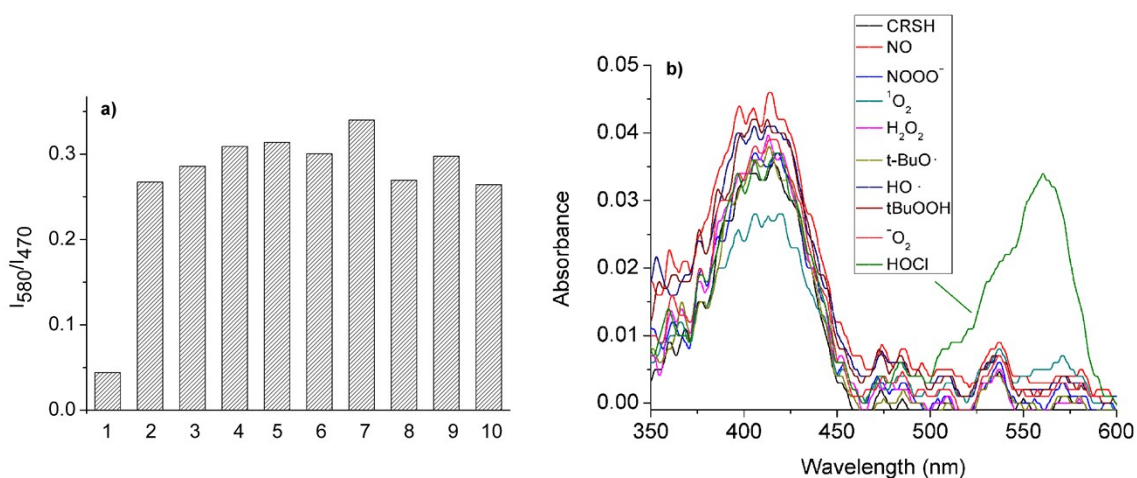

Fig. S4 (a) The ratio ( $I_{580}/I_{470}$ ) of CRSH with addition of ROS/RNS. 1. free CRSH, 2. CRSH+HOCl, 3-10. CRSH+other ROS/RNS ( $^1\text{O}_2$ ,  $\text{H}_2\text{O}_2$ ,  $\text{HO}\cdot$ , NO,  $\text{NOOO}^-$ ,  $^-\text{O}_2$ ,  $t\text{-BuO}\cdot$ ,  $t\text{-BuOOH}$ )+HOCl. (b) Absorption spectra of CRSH toward HOCl (4  $\mu$ M), other ROS/RNS (20  $\mu$ M for  $\text{HO}\cdot$ ,  $\text{ONOO}^-$ , NO,  $\text{H}_2\text{O}_2$ ,  $t\text{-BuOOH}$ ,  $t\text{-BuOO}\cdot$ ,  $^1\text{O}_2$ ,  $^-\text{O}_2$ ), Condition: Condition: [CRSH] = 1  $\mu$ M, NaH<sub>2</sub>PO<sub>4</sub> (0.05 M, pH = 5) : EtOH (5 : 5, v/v).

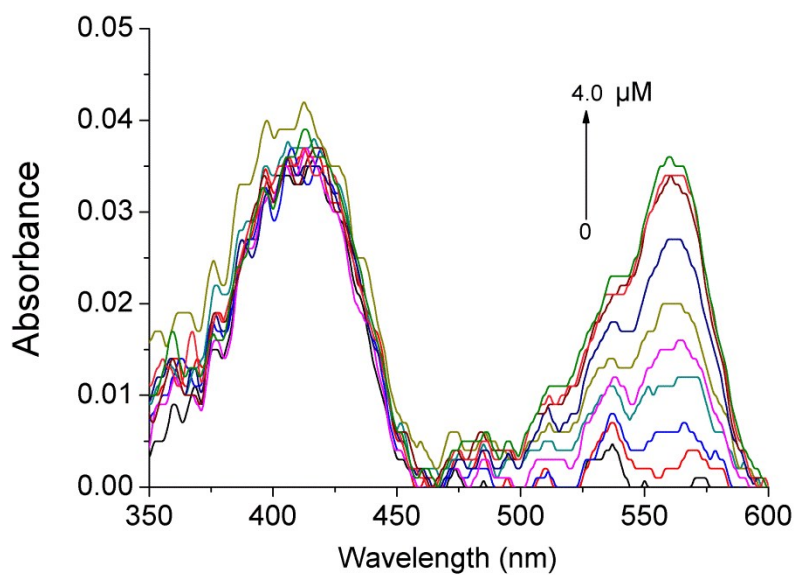

Fig. S5 Absorption spectra of CRSH upon addition of HOCl (0–4  $\mu\text{M}$ ), Condition: [CRSH] = 1  $\mu\text{M}$ ,  $\text{NaH}_2\text{PO}_4$  (0.05 M, pH = 5) : EtOH (5 : 5, v/v).

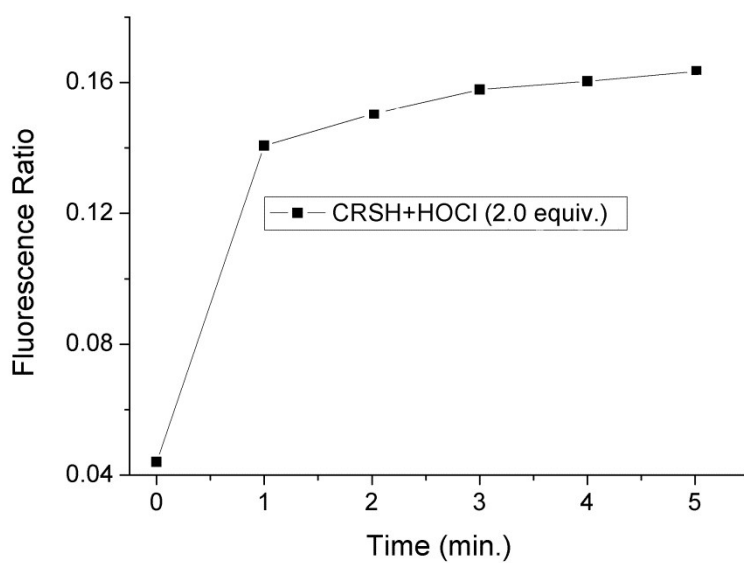

Fig. S6 Time-dependent fluorescence intensity ratio changes of CRSH, Condition: [CRSH] = 1  $\mu\text{M}$ ,  $\text{NaH}_2\text{PO}_4$  (0.05 M, pH = 5) : EtOH (5 : 5, v/v),  $\lambda_{\text{ex}}$ : 350 nm (slit widths: 10 nm/10 nm).

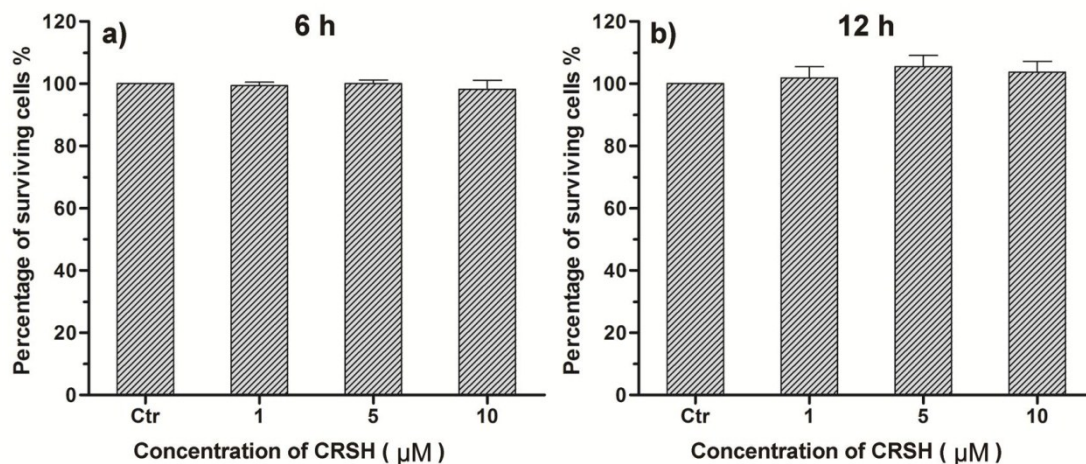

Fig. S7 Viability of RAW264.7 cells after treatment with CRSH for 6 h (a), 12 h (b) at the different concentration (1, 5, 10 μM).

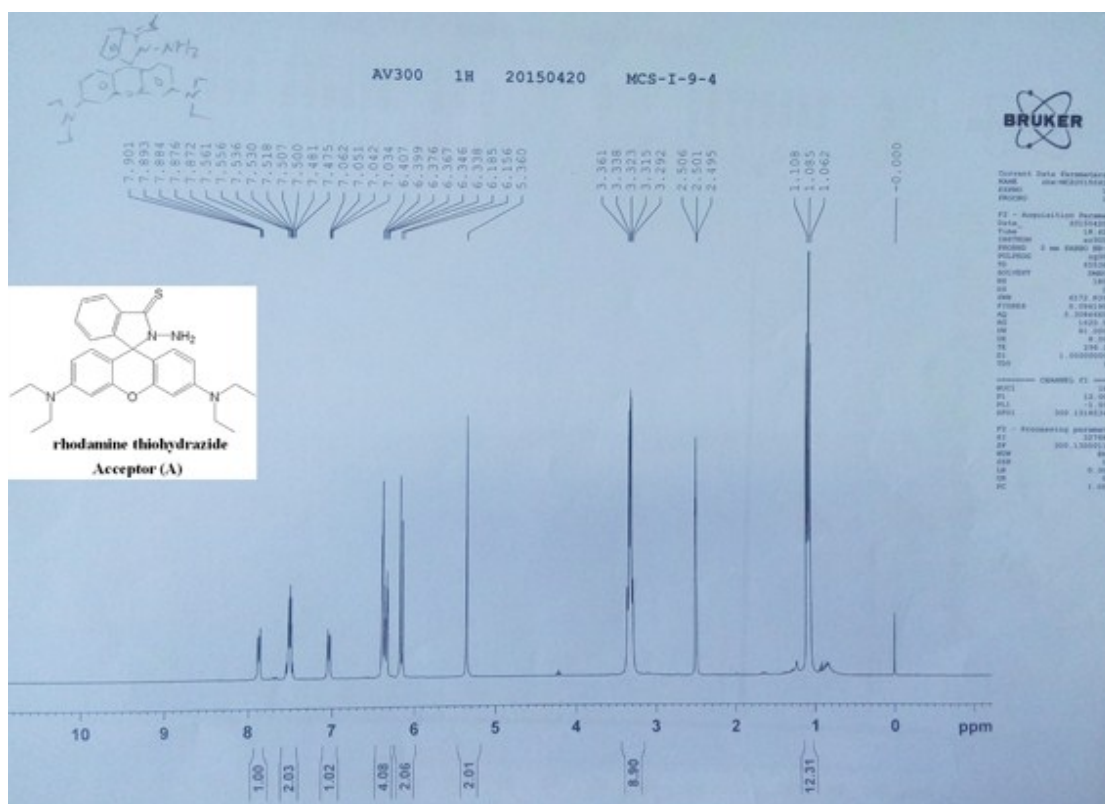



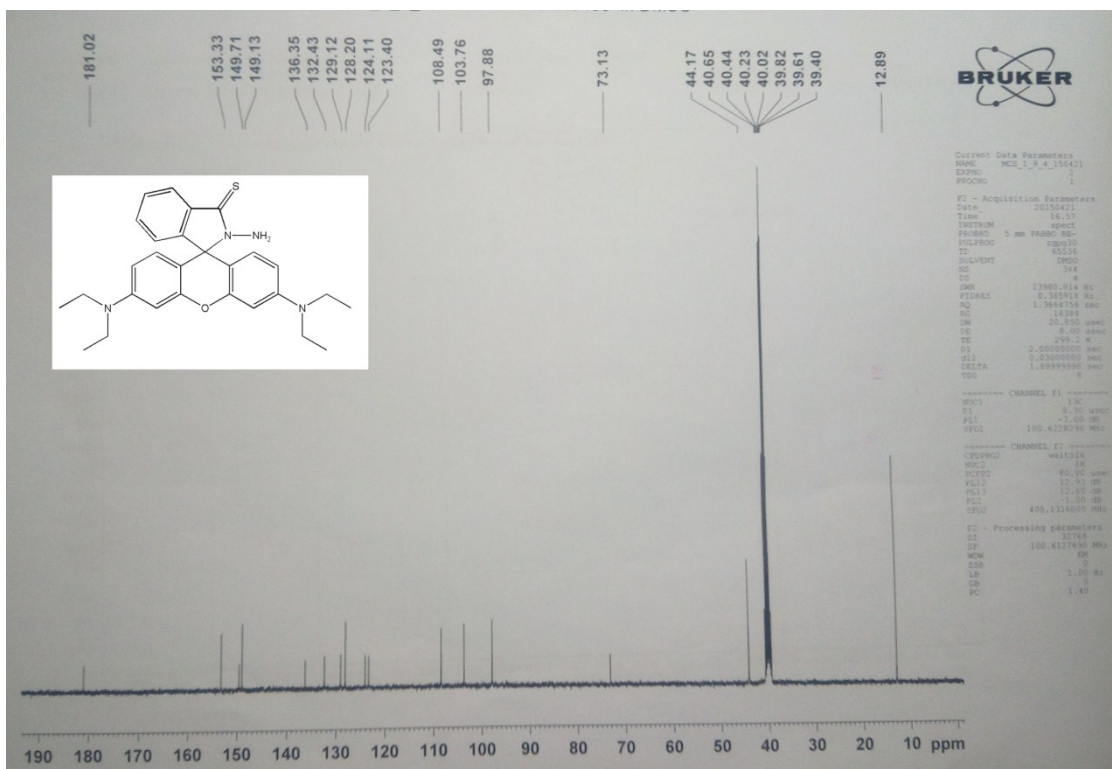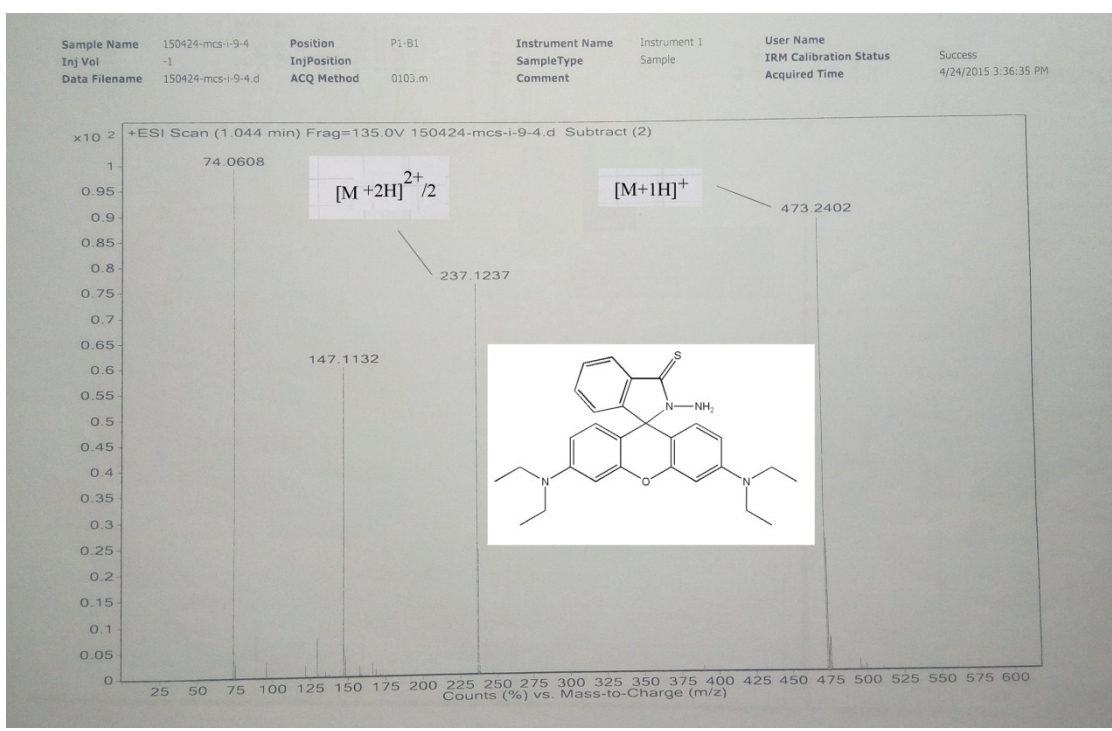

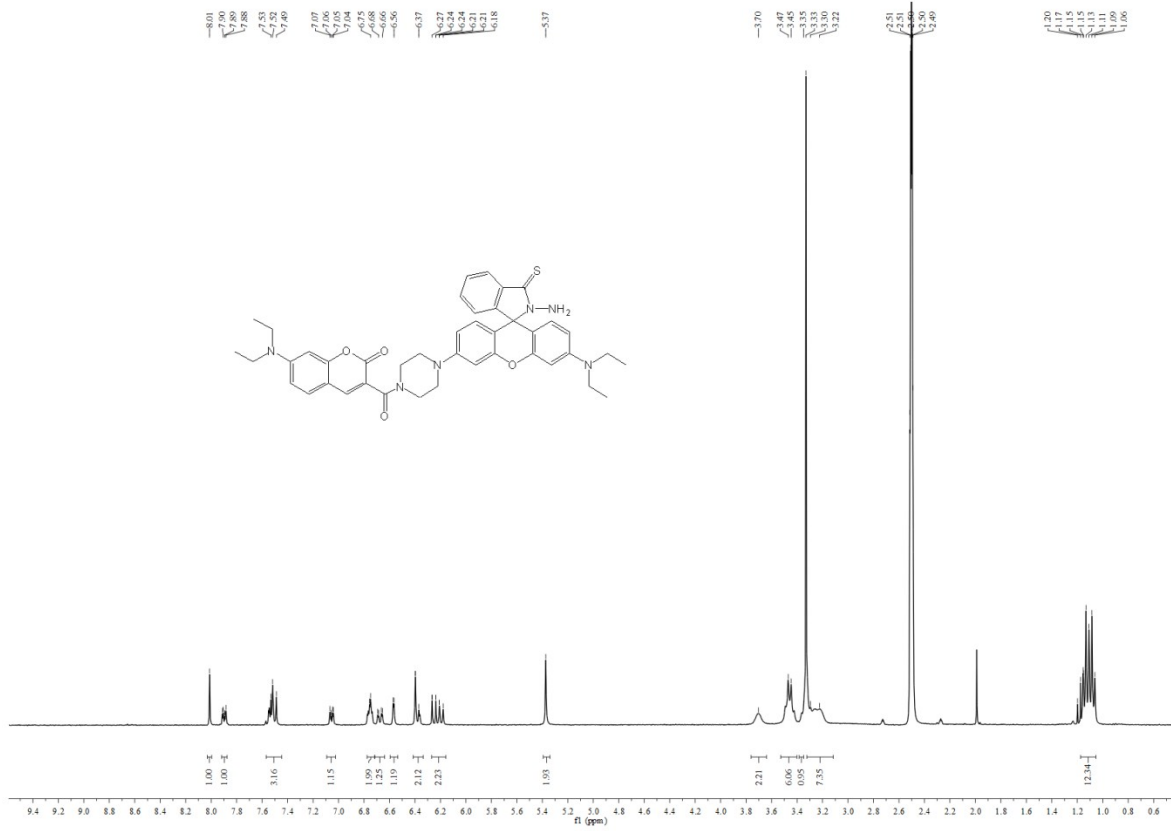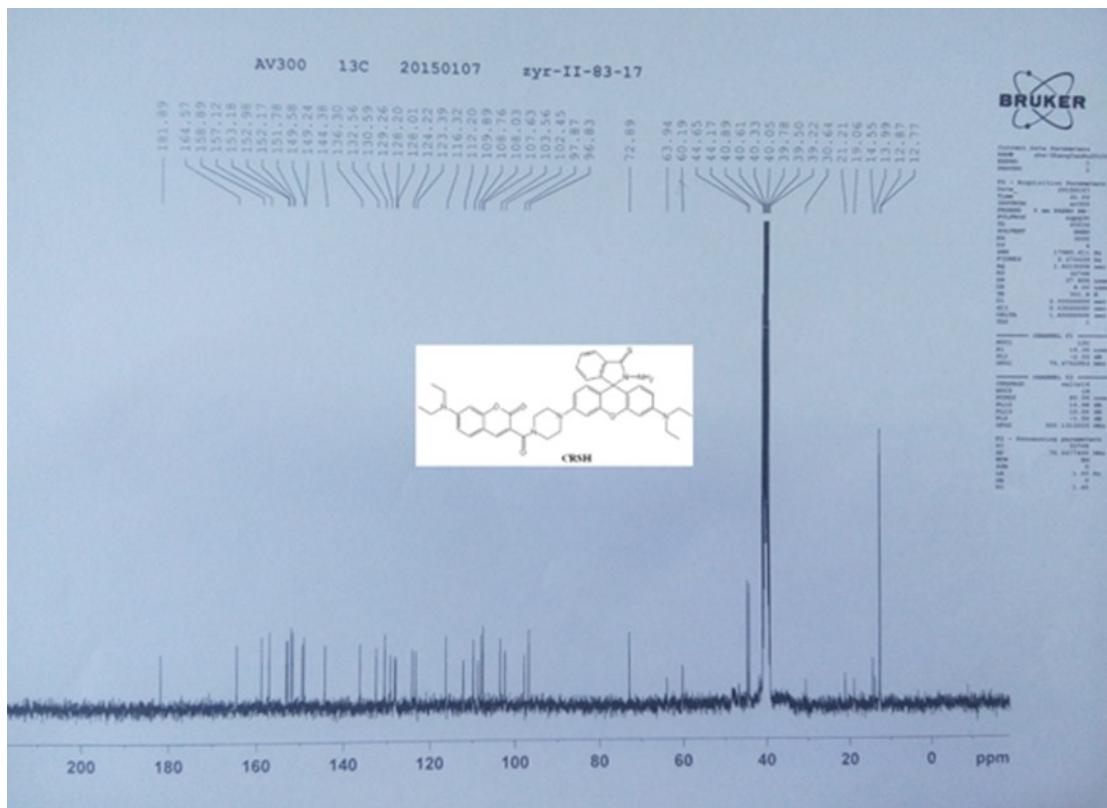



Sample Name: 1030-CRSH      Position: P1-63      Instrument Name: Instrument 1      User Name:   
 Inj Vol: -1      Inj/Position:      Sample Type: Sample      IRM Calibration Status: Success        
 Data Filename: 1030-CRSH.d      ACQ Method: 0103.m      Comment:      Acquired Time: 10/30/2015 2:58:49 PM

CRSH

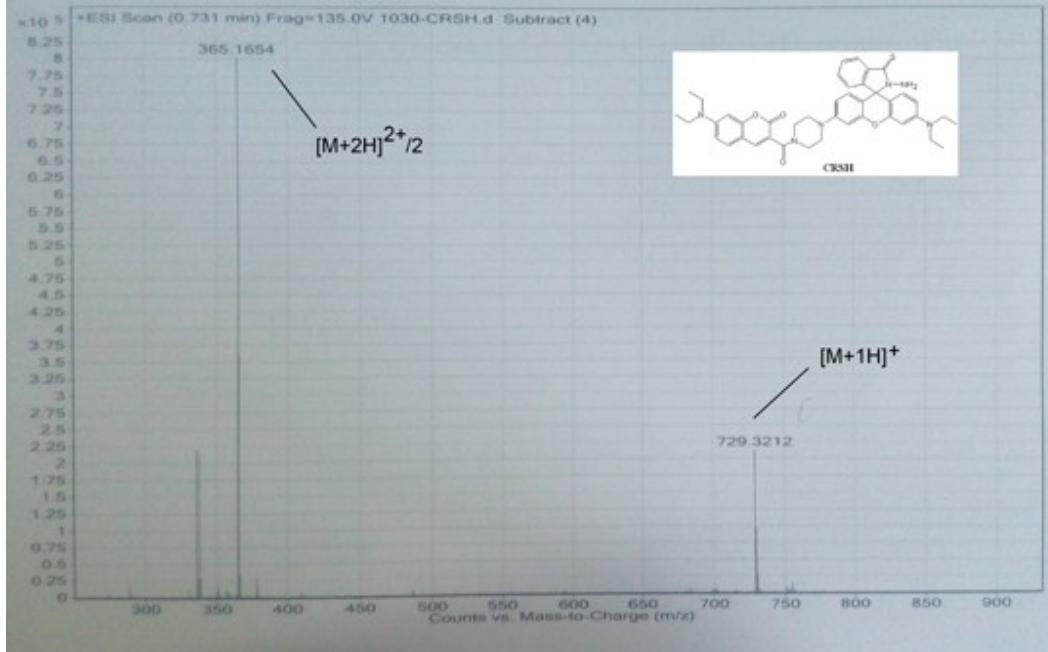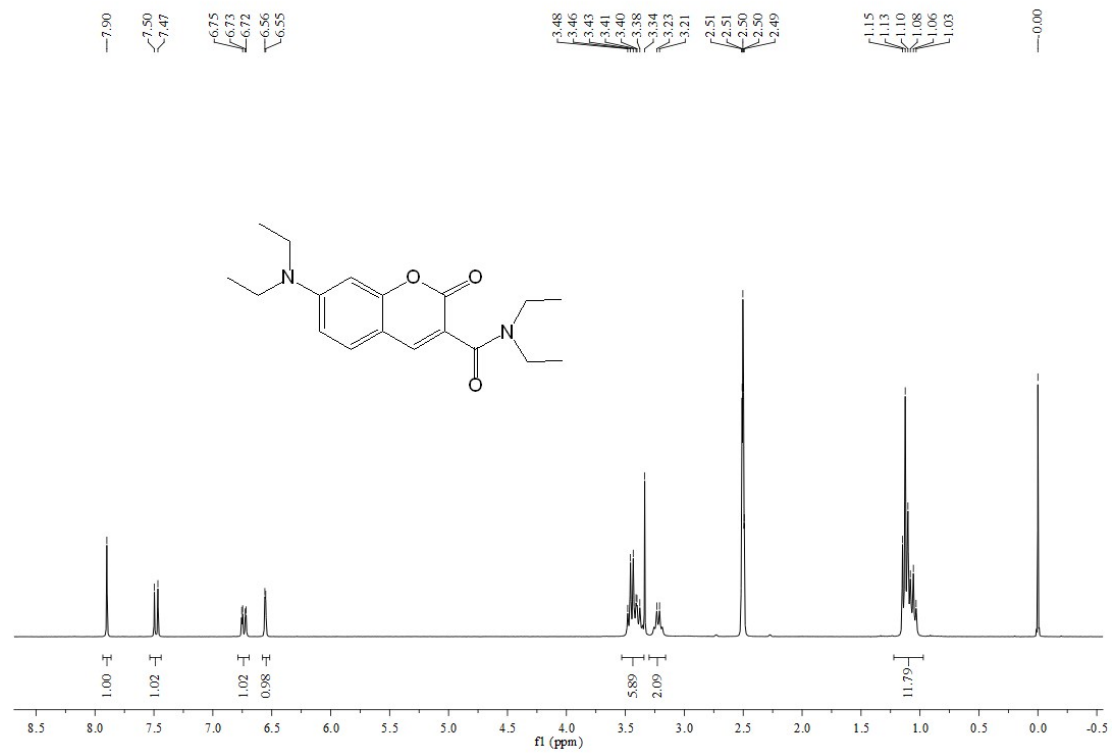

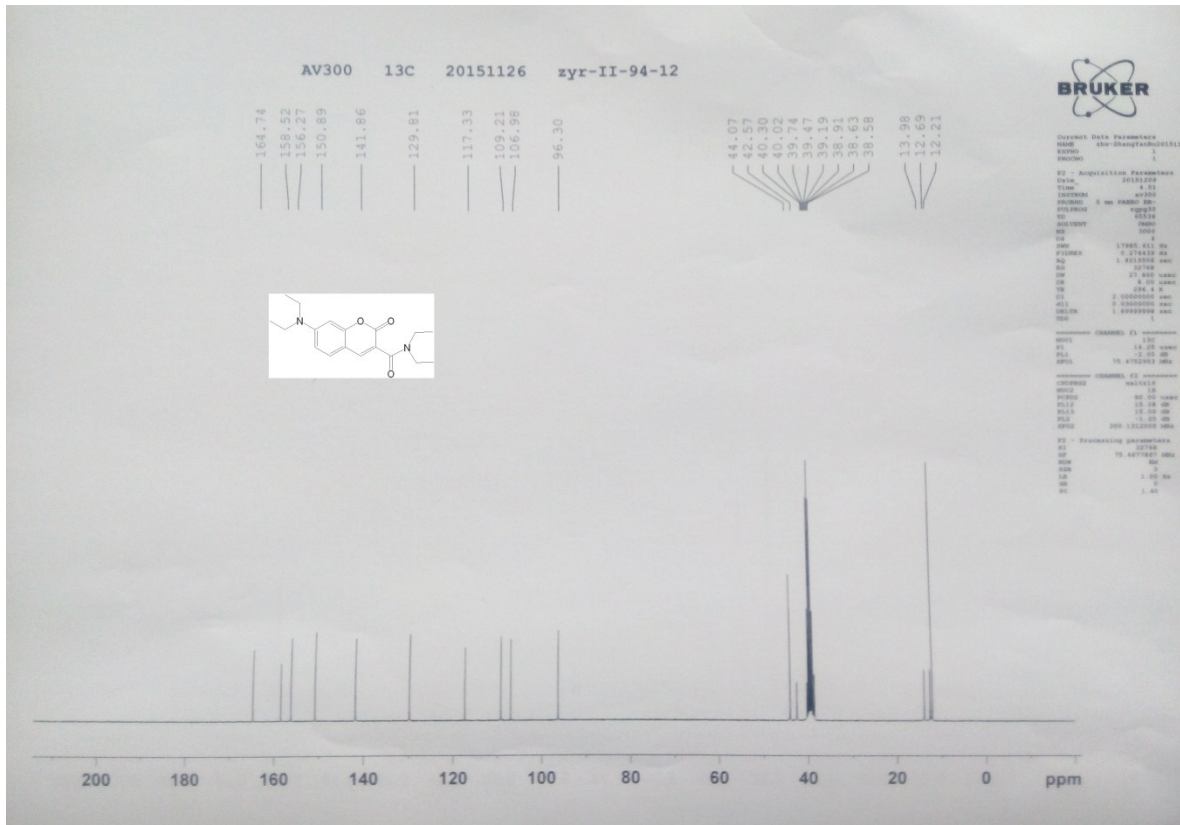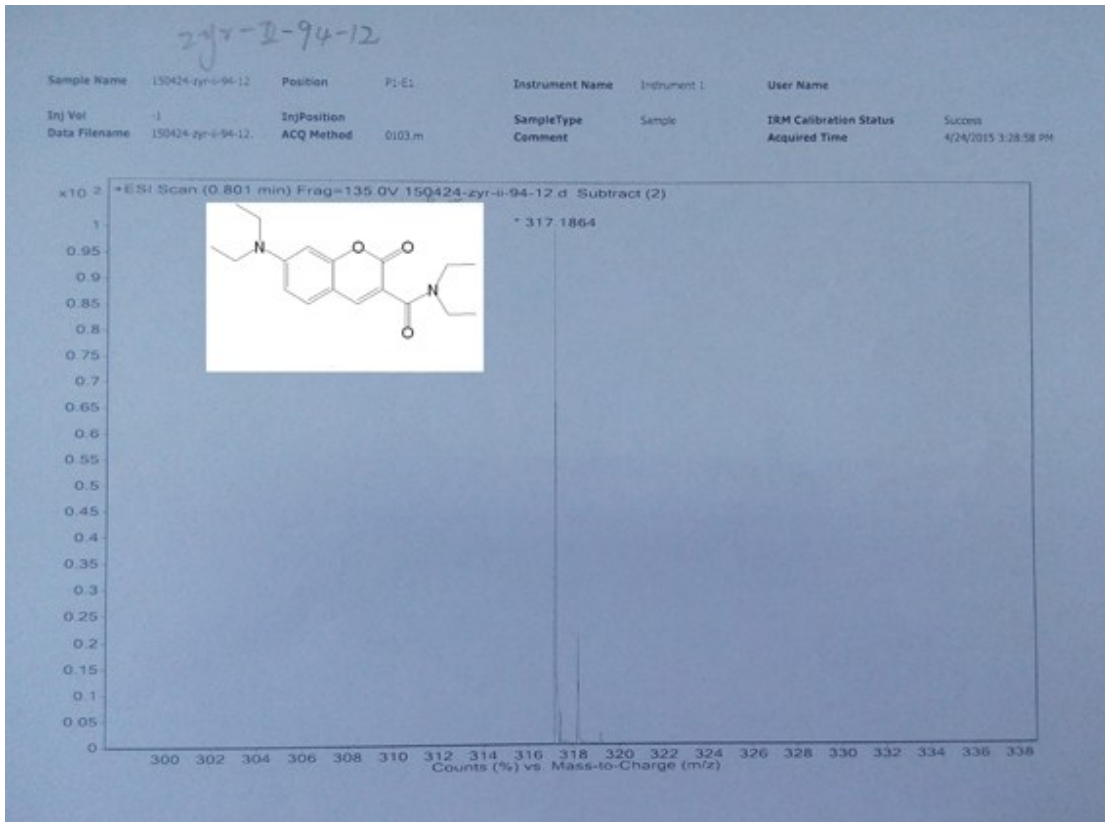

Supplement: c5ra26027b1.pdf [file c5ra26027b1.pdf]
